# Supplementary material
Source: PubMed Central journal article supplement (PMC8269223)
Supplement: msystems.00336-21-sf001.pdf [file msystems.00336-21-sf001.pdf]

**Molecular Mechanisms of the Toll-like Receptor,  
STING, MAVS, Inflammasome, and Interferon Pathways**  
Nathan P. Manes, Aleksandra Nita-Lazar

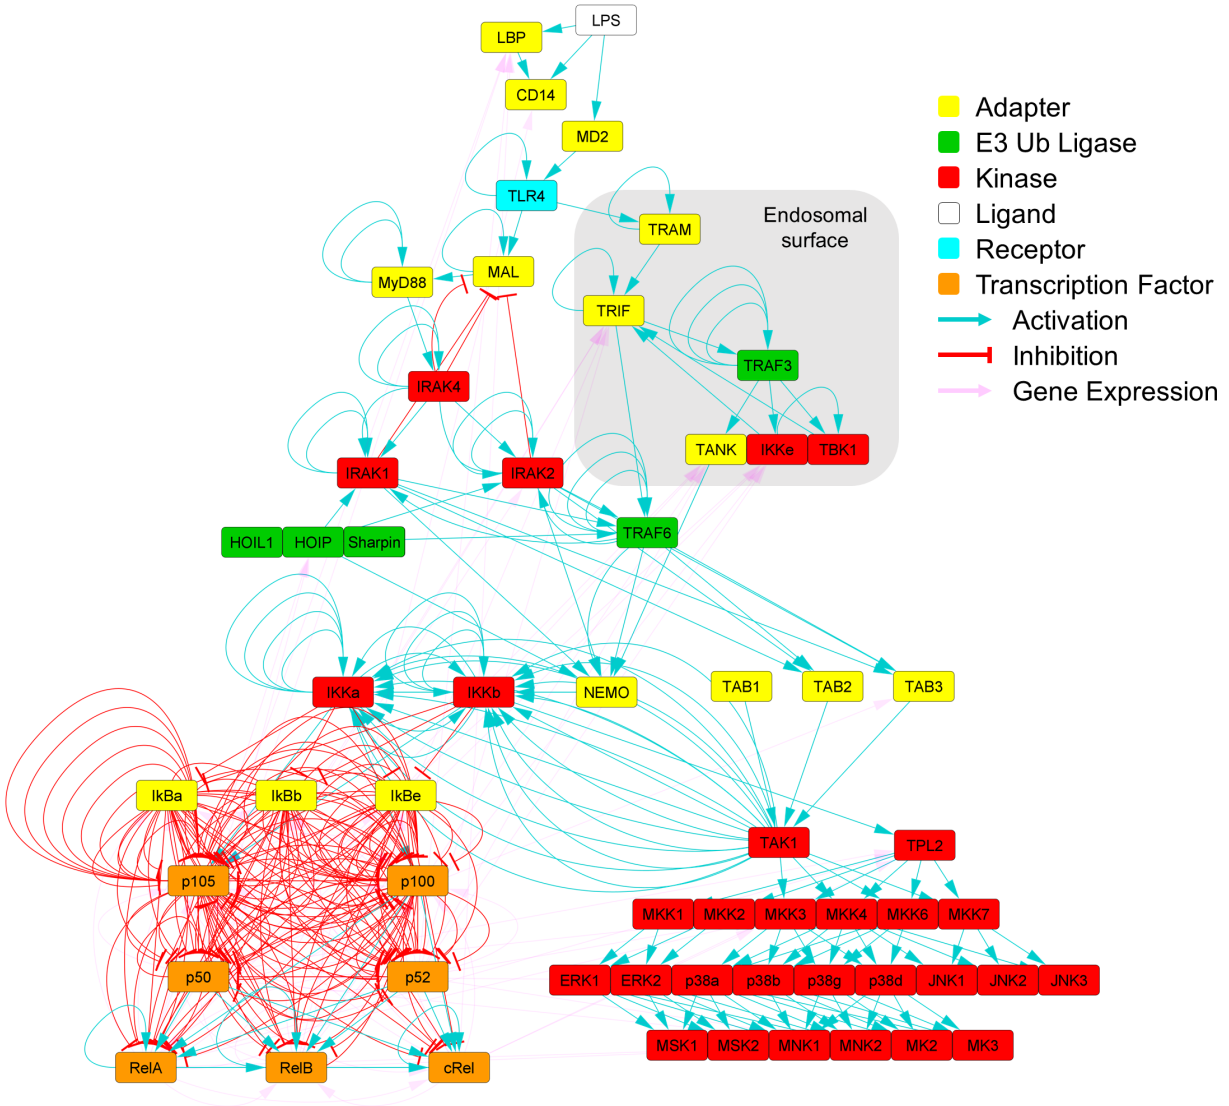

**Supplemental Figure 1. Molecular reaction network of core elements of the TLR4 pathway**  
Instances of multiple edges between nodes indicates that there are multiple molecular interaction mechanisms. For example, the NFκB proteins (p105, p100, p50, p52, RelA, RelB, and cRel) can dimerize, and each dimer can associate with an IκB protein (IκBa, IκBb, IκBe, p105, p100; the other IκB proteins are not shown).
