# Supplementary material
Source: PubMed Central journal article supplement (PMC8269223)
Supplement: msystems.00336-21-sf002.pdf [file msystems.00336-21-sf002.pdf]

**Molecular Mechanisms of the Toll-like Receptor,  
STING, MAVS, Inflammasome, and Interferon Pathways**  
Nathan P. Manes, Aleksandra Nita-Lazar

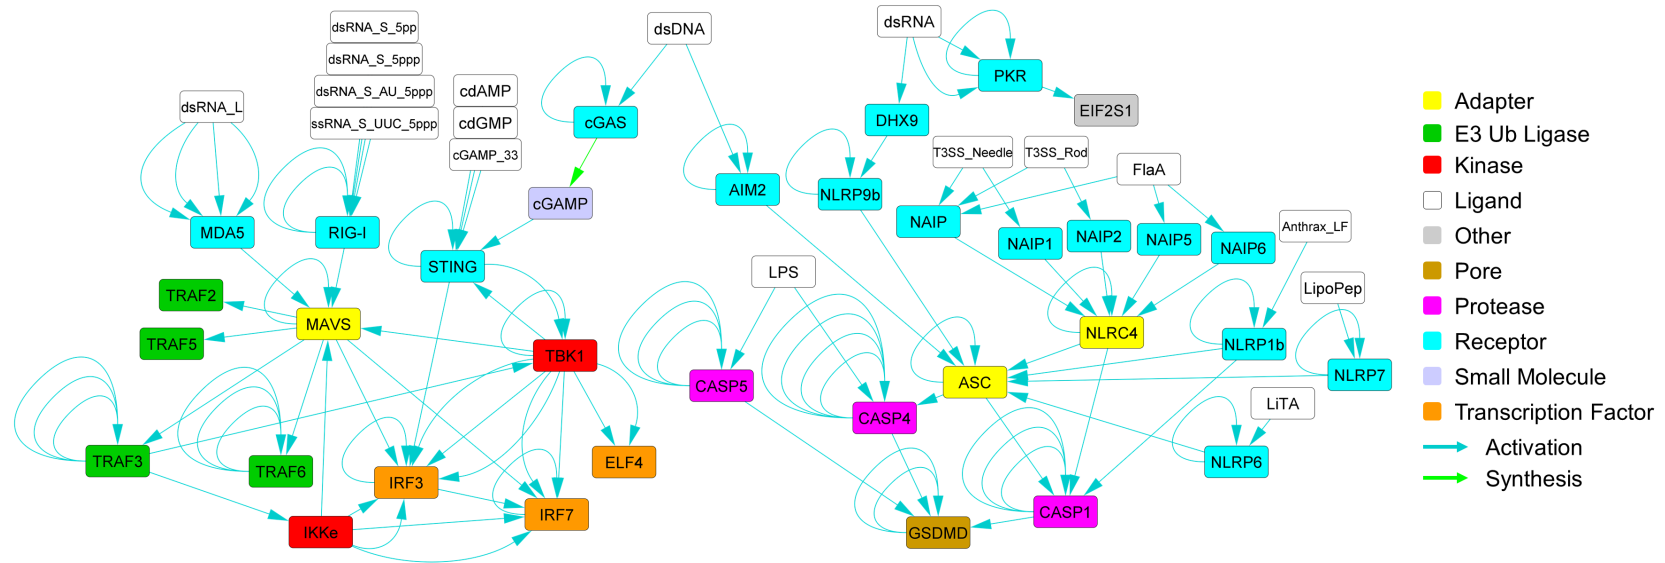

**Supplemental Figure 2. Molecular reaction network of core elements of the cytosolic PRR pathways**

The MAVS and STING pathways are on the left, and the inflammasomes are on the right. The pathway diagram only spans from the PAMPs to selected major effectors (the TRAFs, the transcription factors, and GSDMD). MAVS is active at the cytosolic side of the outer mitochondrial membrane, and STING is active at the cytosolic side of the ER membrane.
